# Supplementary material
Source: PubMed Central journal article supplement (PMC9275769)

## Supplementary Materials

### Supplementary Methods

The difference-in-differences approach requires parallel trends between the treatment and control groups before the intervention. To test this assumption, we compared the trends of adherence with and without switching before generic entry between Non-LIS and LIS with two methods:

(1) We plotted percent of women being adherent with and without switching by quarters before generic entry and after generic entry (See Supplementary Figure 1).

(2) We regressed interaction terms between quarter indicators before generic entry and Non-LIS group indicator on adherence with and without switching, adjusting for all the covariates included in our main analyses. We used the 2<sup>nd</sup> quarter of 2007 as reference and did not include the 1<sup>st</sup> quarter of 2007 as the number of women with adherence with switches was very small in the first quarter of 2007 (See Supplementary Table 3).

We found the interaction terms were only statistically significant at  $\alpha=0.05$  for the interaction between the second quarter of 2008 and Non-LIS for the binary outcome (2). Thus, both methods show that the pre-trends for Non-LIS and LIS were mostly parallel.

## Supplementary Tables

Supplementary Table 1 Predicted Probabilities of Adherence with and without Drug Switches Using Multinomial Logit

| Binary Outcomes               | Non-LIS<br>(Large cost reduction after generic entry) |                                         |                             | LIS<br>(Minimal cost-reduction after generic entry) |                                        |                             | Group Difference due to Cost Reduction         |         |
|-------------------------------|-------------------------------------------------------|-----------------------------------------|-----------------------------|-----------------------------------------------------|----------------------------------------|-----------------------------|------------------------------------------------|---------|
|                               | Pre-Generic Entry Period<br>(N=4,978)                 | Post-Generic Entry Period<br>(N=10,951) | Changes after Generic Entry | Pre-Generic Entry Period<br>(N=1,582)               | Post-Generic Entry Period<br>(N=3,166) | Changes after Generic Entry | Group Differential Changes after Generic Entry | p-value |
| Adherent without switches     | 0.696<br>(0.683 ,<br>0.709)                           | 0.780<br>(0.772 ,<br>0.788)             | 0.084<br>(0.069 , 0.099)    | 0.821<br>(0.802 ,<br>0.840)                         | 0.771<br>(0.756 , 0.787)               | -0.049<br>(-0.073 , -0.026) | 0.135<br>(0.107 , 0.163)                       | <0.001  |
| Adherent with switches        | 0.068<br>(0.061 ,<br>0.075)                           | 0.131<br>(0.125 ,<br>0.138)             | 0.063<br>(0.054 , 0.073)    | 0.069<br>(0.056 ,<br>0.082)                         | 0.114<br>(0.102 , 0.126)               | 0.045<br>(0.028 , 0.062)    | 0.019<br>(-0.000 , 0.039)                      | 0.052   |
| Non-adherent with switches    | 0.027<br>(0.022 ,<br>0.031)                           | 0.018<br>(0.016 ,<br>0.021)             | -0.009<br>(-0.014 , -0.003) | 0.013<br>(0.008 ,<br>0.018)                         | 0.020<br>(0.015 , 0.025)               | 0.007<br>(0.001 , 0.014)    | -0.017<br>(-0.027 , -0.008)                    | <0.001  |
| Non-adherent without switches | 0.210<br>(0.198 ,<br>0.221)                           | 0.070<br>(0.066 ,<br>0.075)             | -0.139<br>(-0.152 , -0.126) | 0.097<br>(0.083 ,<br>0.111)                         | 0.095<br>(0.084 , 0.105)               | -0.003<br>(-0.019 , 0.014)  | -0.137<br>(-0.158 , -0.116)                    | <0.001  |

Supplementary Table 2 Coefficients for All Variables in Linear Probability Models

| Variables    | Binary Outcome (1): Adherent without Switches |         |                     |             | Binary Outcome (2): Adherent with Switches |         |                     |             |
|--------------|-----------------------------------------------|---------|---------------------|-------------|--------------------------------------------|---------|---------------------|-------------|
|              | Coefficient                                   | p-Value | Confidence Interval |             | Coefficient                                | p-Value | Confidence Interval |             |
|              |                                               |         | Lower Limit         | Upper Limit |                                            |         | Lower Limit         | Upper Limit |
| Intercept    | 0.706                                         | <.0001  | 0.629               | 0.783       | 0.218                                      | <.0001  | 0.164               | 0.273       |
| Post         | -0.048                                        | 0.000   | -0.073              | -0.024      | 0.044                                      | <.0001  | 0.027               | 0.060       |
| Post*Non-LIS | 0.128                                         | <.0001  | 0.099               | 0.157       | 0.021                                      | 0.033   | 0.002               | 0.040       |
| Non-LIS      | -0.121                                        | <.0001  | -0.146              | -0.096      | -0.003                                     | 0.709   | -0.018              | 0.012       |
| Age at DX    | 0.002                                         | <.0001  | 0.001               | 0.003       | -0.002                                     | <.0001  | -0.003              | -0.001      |
| Race         |                                               |         |                     |             |                                            |         |                     |             |
| White        | Ref                                           |         |                     |             | Ref                                        |         |                     |             |
| Black        | -0.016                                        | 0.177   | -0.038              | 0.007       | -0.027                                     | 0.000   | -0.042              | -0.012      |
| Asian        | 0.024                                         | 0.140   | -0.008              | 0.055       | -0.017                                     | 0.143   | -0.041              | 0.006       |
| Hispanic     | -0.052                                        | 0.021   | -0.097              | -0.008      | 0.005                                      | 0.747   | -0.026              | 0.037       |
| Other        | 0.056                                         | 0.001   | 0.024               | 0.088       | -0.021                                     | 0.106   | -0.046              | 0.004       |
| Married      | -0.002                                        | 0.775   | -0.014              | 0.011       | 0.012                                      | 0.009   | 0.003               | 0.022       |
| Location     |                                               |         |                     |             |                                            |         |                     |             |
| Big Metro    | Ref                                           |         |                     |             | Ref                                        |         |                     |             |
| Urban        | 0.021                                         | 0.007   | 0.006               | 0.035       | -0.020                                     | 0.000   | -0.030              | -0.009      |
| Rural        | 0.065                                         | 0.009   | 0.016               | 0.113       | -0.032                                     | 0.062   | -0.065              | 0.002       |
| HR Status    |                                               |         |                     |             |                                            |         |                     |             |
| ER+/PR+      | 0.000                                         | .       | 0.000               | 0.000       | 0.000                                      | .       | 0.000               | 0.000       |
| ER-/PR+      | 0.011                                         | 0.786   | -0.067              | 0.088       | -0.012                                     | 0.651   | -0.066              | 0.041       |
| ER+/PR-      | -0.001                                        | 0.927   | -0.017              | 0.016       | 0.003                                      | 0.579   | -0.009              | 0.015       |
| Stage        |                                               |         |                     |             |                                            |         |                     |             |
| I            | Ref                                           |         |                     |             | Ref                                        |         |                     |             |
| 0            | 0.023                                         | 0.216   | -0.014              | 0.060       | -0.019                                     | 0.158   | -0.045              | 0.007       |
| II           | -0.006                                        | 0.670   | -0.033              | 0.021       | 0.004                                      | 0.659   | -0.015              | 0.024       |
| III          | -0.044                                        | 0.027   | -0.083              | -0.005      | 0.016                                      | 0.272   | -0.012              | 0.044       |
| IV           | -0.083                                        | 0.000   | -0.126              | -0.040      | 0.051                                      | 0.001   | 0.020               | 0.081       |
| Unknown      | -0.028                                        | 0.225   | -0.072              | 0.017       | -0.009                                     | 0.541   | -0.038              | 0.020       |

|                        |        |        |        |        |        |       |        |        |  |
|------------------------|--------|--------|--------|--------|--------|-------|--------|--------|--|
| Tumor Grade            |        |        |        |        |        |       |        |        |  |
| Low                    | Ref    |        |        |        |        | Ref   |        |        |  |
| High                   | -0.023 | 0.005  | -0.039 | -0.007 | 0.015  | 0.013 | 0.003  | 0.026  |  |
| Unknown                | 0.004  | 0.770  | -0.022 | 0.030  | 0.000  | 0.982 | -0.018 | 0.019  |  |
| Tumor Size             |        |        |        |        |        |       |        |        |  |
| 0 - <1 cm              | Ref    |        |        |        |        | Ref   |        |        |  |
| 1 - 2 cm               | -0.003 | 0.679  | -0.019 | 0.012  | -0.010 | 0.098 | -0.022 | 0.002  |  |
| >2 cm                  | -0.017 | 0.196  | -0.043 | 0.009  | -0.011 | 0.247 | -0.031 | 0.008  |  |
| Unknown                | 0.020  | 0.350  | -0.022 | 0.063  | 0.001  | 0.943 | -0.030 | 0.032  |  |
| Lymph Node Involvement |        |        |        |        |        |       |        |        |  |
| Negative               | Ref    |        |        |        |        | Ref   |        |        |  |
| Positive               | -0.003 | 0.809  | -0.025 | 0.019  | 0.000  | 0.989 | -0.016 | 0.016  |  |
| Not Examined           | 0.015  | 0.173  | -0.006 | 0.036  | -0.015 | 0.040 | -0.030 | -0.001 |  |
| Radiation              | 0.014  | 0.058  | 0.000  | 0.029  | -0.005 | 0.381 | -0.016 | 0.006  |  |
| Surgery                |        |        |        |        |        |       |        |        |  |
| Lumpectomy             | Ref    |        |        |        |        | Ref   |        |        |  |
| Mastectomy             | 0.008  | 0.302  | -0.008 | 0.025  | -0.001 | 0.828 | -0.013 | 0.010  |  |
| No/Other/Unknown       | -0.035 | 0.028  | -0.066 | -0.004 | 0.014  | 0.219 | -0.008 | 0.036  |  |
| Part D Coverage        |        |        |        |        |        |       |        |        |  |
| MAPD                   |        |        |        |        |        |       |        |        |  |
| PDP                    | -0.041 | <.0001 | -0.054 | -0.028 | 0.015  | 0.002 | 0.005  | 0.025  |  |
| Mixed                  | -0.019 | 0.222  | -0.049 | 0.011  | 0.007  | 0.557 | -0.015 | 0.029  |  |
| Cancer Registry        |        |        |        |        |        |       |        |        |  |
| California             | Ref    |        |        |        |        | Ref   |        |        |  |
| Connecticut            | -0.003 | 0.851  | -0.031 | 0.025  | 0.003  | 0.767 | -0.018 | 0.024  |  |
| Detroit                | -0.013 | 0.424  | -0.044 | 0.018  | -0.014 | 0.225 | -0.036 | 0.008  |  |
| Hawaii                 | -0.064 | 0.012  | -0.115 | -0.014 | 0.027  | 0.153 | -0.010 | 0.064  |  |
| Iowa                   | 0.017  | 0.293  | -0.014 | 0.048  | -0.029 | 0.007 | -0.051 | -0.008 |  |
| New Mexico             | -0.057 | 0.013  | -0.102 | -0.012 | 0.049  | 0.007 | 0.013  | 0.085  |  |
| Seattle                | 0.000  | 0.997  | -0.029 | 0.029  | -0.018 | 0.086 | -0.039 | 0.003  |  |
| Utah                   | -0.003 | 0.908  | -0.046 | 0.041  | -0.025 | 0.097 | -0.054 | 0.004  |  |
| Kentucky               | -0.002 | 0.902  | -0.030 | 0.026  | -0.020 | 0.053 | -0.039 | 0.000  |  |

|            |        |       |        |        |        |       |        |        |
|------------|--------|-------|--------|--------|--------|-------|--------|--------|
| Louisiana  | -0.033 | 0.022 | -0.062 | -0.005 | -0.002 | 0.809 | -0.023 | 0.018  |
| New Jersey | 0.026  | 0.009 | 0.006  | 0.046  | -0.019 | 0.011 | -0.033 | -0.004 |
| Georgia    | -0.037 | 0.001 | -0.059 | -0.015 | 0.003  | 0.699 | -0.013 | 0.019  |

| Variables    | Binary Outcome (3): Non-adherent with Switches |         |                     |             | Binary Outcome (4): Non-Adherent without Switches |         |                     |             |
|--------------|------------------------------------------------|---------|---------------------|-------------|---------------------------------------------------|---------|---------------------|-------------|
|              | Coefficient                                    | p-Value | Confidence Interval |             | Coefficient                                       | p-Value | Confidence Interval |             |
|              |                                                |         | Lower Limit         | Upper Limit |                                                   |         | Lower Limit         | Upper Limit |
| Intercept    | 0.053                                          | <.0001  | 0.028               | 0.079       | 0.022                                             | 0.448   | -0.035              | 0.080       |
| Post         | 0.009                                          | 0.036   | 0.001               | 0.017       | -0.004                                            | 0.710   | -0.023              | 0.016       |
| Post*Non-LIS | -0.018                                         | 0.000   | -0.027              | -0.008      | -0.131                                            | <.0001  | -0.154              | -0.108      |
| Non-LIS      | 0.015                                          | 0.000   | 0.007               | 0.023       | 0.109                                             | <.0001  | 0.089               | 0.129       |
| Age at DX    | -0.001                                         | <.0001  | -0.001              | 0.000       | 0.001                                             | 0.071   | 0.000               | 0.001       |
| Race         |                                                |         |                     |             |                                                   |         |                     |             |
| White        | Ref                                            |         |                     |             | Ref                                               |         |                     |             |
| Black        | -0.005                                         | 0.234   | -0.012              | 0.003       | 0.047                                             | <.0001  | 0.029               | 0.066       |
| Asian        | -0.012                                         | 0.003   | -0.020              | -0.004      | 0.006                                             | 0.606   | -0.017              | 0.029       |
| Hispanic     | 0.001                                          | 0.902   | -0.013              | 0.015       | 0.046                                             | 0.008   | 0.012               | 0.080       |
| Other        | -0.011                                         | 0.022   | -0.020              | -0.002      | -0.024                                            | 0.024   | -0.046              | -0.003      |
| Married      | -0.003                                         | 0.154   | -0.007              | 0.001       | -0.007                                            | 0.112   | -0.016              | 0.002       |
| Location     |                                                |         |                     |             |                                                   |         |                     |             |
| Big Metro    | Ref                                            |         |                     |             | Ref                                               |         |                     |             |
| Urban        | -0.004                                         | 0.103   | -0.010              | 0.001       | 0.003                                             | 0.543   | -0.008              | 0.014       |
| Rural        | -0.008                                         | 0.345   | -0.026              | 0.009       | -0.025                                            | 0.177   | -0.060              | 0.011       |
| HR Status    |                                                |         |                     |             |                                                   |         |                     |             |
| ER+/PR+      | 0.000                                          | .       | 0.000               | 0.000       | 0.000                                             | .       | 0.000               | 0.000       |
| ER-/PR+      | 0.000                                          | 0.993   | -0.028              | 0.028       | 0.002                                             | 0.957   | -0.056              | 0.059       |
| ER+/PR-      | -0.002                                         | 0.412   | -0.008              | 0.003       | 0.000                                             | 0.954   | -0.012              | 0.012       |
| Stage        |                                                |         |                     |             |                                                   |         |                     |             |
| I            | Ref                                            |         |                     |             | Ref                                               |         |                     |             |
| 0            | 0.000                                          | 0.978   | -0.012              | 0.012       | -0.005                                            | 0.744   | -0.032              | 0.023       |
| II           | 0.001                                          | 0.881   | -0.008              | 0.009       | 0.001                                             | 0.940   | -0.019              | 0.021       |

|                        |        |       |        |       |        |        |        |        |
|------------------------|--------|-------|--------|-------|--------|--------|--------|--------|
| III                    | 0.005  | 0.413 | -0.007 | 0.017 | 0.023  | 0.127  | -0.007 | 0.053  |
| IV                     | 0.000  | 0.944 | -0.014 | 0.013 | 0.033  | 0.053  | 0.000  | 0.066  |
| Unknown                | -0.004 | 0.493 | -0.015 | 0.007 | 0.040  | 0.029  | 0.004  | 0.077  |
| Tumor Grade            |        |       |        |       |        |        |        |        |
| Low                    | Ref    |       |        |       | Ref    |        |        |        |
| High                   | 0.002  | 0.508 | -0.004 | 0.007 | 0.006  | 0.290  | -0.005 | 0.018  |
| Unknown                | -0.006 | 0.100 | -0.014 | 0.001 | 0.002  | 0.811  | -0.017 | 0.022  |
| Tumor Size             |        |       |        |       |        |        |        |        |
| 0 - <1 cm              | Ref    |       |        |       | Ref    |        |        |        |
| 1 - 2 cm               | 0.003  | 0.313 | -0.002 | 0.008 | 0.011  | 0.055  | 0.000  | 0.021  |
| >2 cm                  | 0.006  | 0.129 | -0.002 | 0.014 | 0.022  | 0.021  | 0.003  | 0.041  |
| Unknown                | -0.002 | 0.781 | -0.013 | 0.010 | -0.020 | 0.234  | -0.053 | 0.013  |
| Lymph Node Involvement |        |       |        |       |        |        |        |        |
| Negative               | Ref    |       |        |       | Ref    |        |        |        |
| Positive               | 0.002  | 0.529 | -0.005 | 0.010 | 0.000  | 0.959  | -0.016 | 0.017  |
| Not Examined           | -0.002 | 0.515 | -0.009 | 0.005 | 0.003  | 0.708  | -0.013 | 0.019  |
| Radiation              | 0.002  | 0.466 | -0.003 | 0.007 | -0.011 | 0.040  | -0.022 | -0.001 |
| Surgery                |        |       |        |       |        |        |        |        |
| Lumpectomy             | Ref    |       |        |       | Ref    |        |        |        |
| Mastectomy             | 0.005  | 0.092 | -0.001 | 0.011 | -0.012 | 0.042  | -0.024 | 0.000  |
| No/Other/Unknown       | 0.011  | 0.042 | 0.000  | 0.021 | 0.010  | 0.389  | -0.013 | 0.034  |
| Part D Coverage        |        |       |        |       |        |        |        |        |
| MAPD                   |        |       |        |       |        |        |        |        |
| PDP                    | 0.007  | 0.007 | 0.002  | 0.011 | 0.019  | <.0001 | 0.010  | 0.029  |
| Mixed                  | 0.005  | 0.375 | -0.006 | 0.016 | 0.007  | 0.519  | -0.015 | 0.029  |
| Cancer Registry        |        |       |        |       |        |        |        |        |
| California             | Ref    |       |        |       | Ref    |        |        |        |
| Connecticut            | 0.005  | 0.366 | -0.005 | 0.015 | -0.005 | 0.618  | -0.025 | 0.015  |
| Detroit                | 0.006  | 0.305 | -0.005 | 0.017 | 0.020  | 0.077  | -0.002 | 0.043  |
| Hawaii                 | 0.016  | 0.064 | -0.001 | 0.033 | 0.021  | 0.251  | -0.015 | 0.057  |
| Iowa                   | -0.002 | 0.720 | -0.012 | 0.008 | 0.015  | 0.230  | -0.009 | 0.038  |
| New Mexico             | 0.009  | 0.286 | -0.007 | 0.025 | 0.000  | 0.975  | -0.030 | 0.029  |

|            |        |       |        |       |        |       |        |       |
|------------|--------|-------|--------|-------|--------|-------|--------|-------|
| Seattle    | 0.006  | 0.289 | -0.005 | 0.017 | 0.012  | 0.241 | -0.008 | 0.033 |
| Utah       | 0.007  | 0.373 | -0.009 | 0.024 | 0.020  | 0.227 | -0.012 | 0.053 |
| Kentucky   | 0.000  | 0.975 | -0.010 | 0.010 | 0.021  | 0.051 | 0.000  | 0.042 |
| Louisiana  | 0.004  | 0.460 | -0.006 | 0.013 | 0.032  | 0.004 | 0.010  | 0.054 |
| New Jersey | -0.004 | 0.188 | -0.011 | 0.002 | -0.003 | 0.679 | -0.018 | 0.011 |
| Georgia    | 0.016  | 0.001 | 0.007  | 0.025 | 0.018  | 0.031 | 0.002  | 0.034 |

---

Supplementary Table 3 Coefficients for interaction terms between quarter indicators before generic entry and Non-LIS group indicator with and without switching

| Interaction terms between quarter indicator and Non-LIS | Binary Outcome (1): Adherent without Switches | Binary Outcome (2): Adherent with Switches | Binary Outcome (3): Non-adherent with Switches | Binary Outcome (4): Non-Adherent without Switches |
|---------------------------------------------------------|-----------------------------------------------|--------------------------------------------|------------------------------------------------|---------------------------------------------------|
|                                                         | Coefficient (p-Value)                         | Coefficient (p-Value)                      | Coefficient (p-Value)                          | Coefficient (p-Value)                             |
| 3 <sup>rd</sup> quarter of 2007*Non-LIS                 | 0.0328<br>(0.446)                             | -0.0224<br>(0.414)                         | -0.0101<br>(0.406)                             | -0.000219<br>(0.995)                              |
| 4 <sup>th</sup> quarter of 2007*Non-LIS                 | -0.0479<br>(0.245)                            | 0.0349<br>(0.166)                          | -0.0113<br>(0.368)                             | 0.0244<br>(0.478)                                 |
| 1 <sup>st</sup> quarter of 2008*Non-LIS                 | -0.0476<br>(0.245)                            | 0.0130<br>(0.617)                          | -0.0153<br>(0.217)                             | 0.0500<br>(0.138)                                 |
| 2 <sup>nd</sup> quarter of 2008*Non-LIS                 | -0.0716<br>(0.112)                            | 0.0577*<br>(0.029)                         | -0.00766<br>(0.556)                            | 0.0216<br>(0.573)                                 |

*p*-values in parentheses



**Supplementary Figures**

Supplementary Figure 1 Percent of adherence with and without drug switches by quarter of initiation

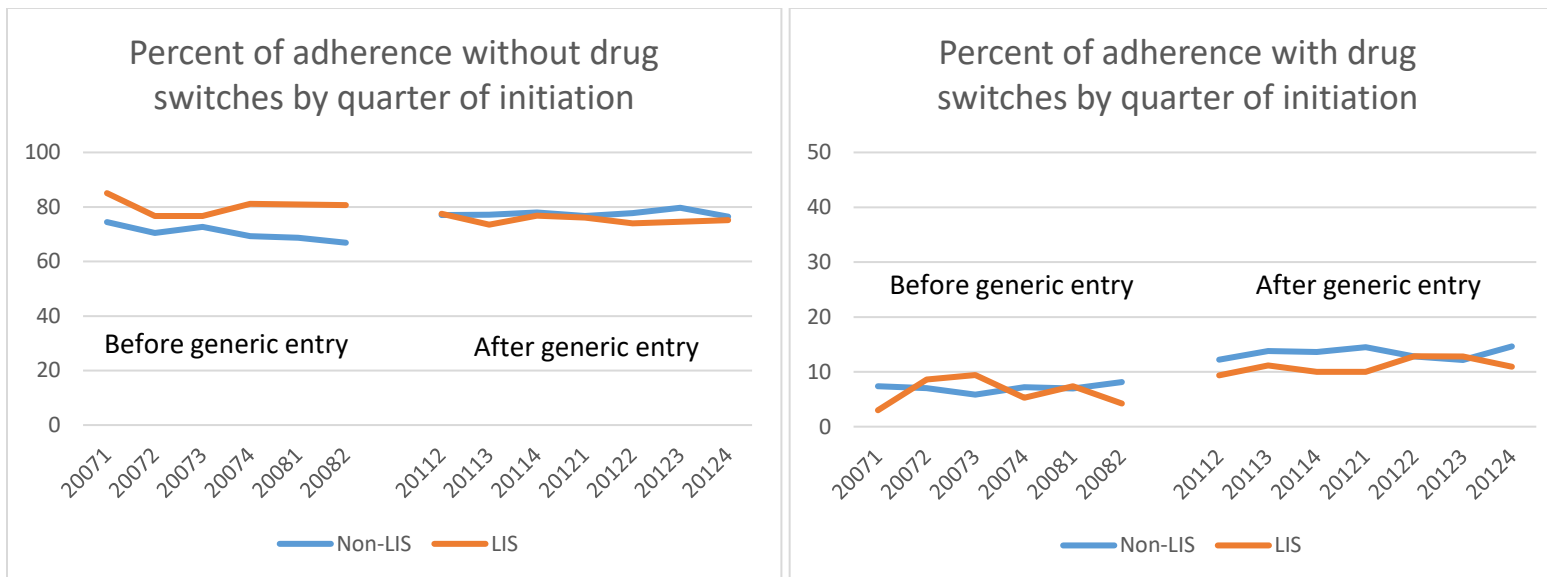

Supplement: djac062_supplementary_data.pdf [file djac062_supplementary_data.pdf]
